# Supplementary material for: Ferroptosis‐modulating small molecules for targeting drug‐resistant cancer: Challenges and opportunities in manipulating redox signaling
Source: PubMed Central journal article supplement (PMC10947485; doi:10.1002/med.21933), 2023-01-19
Supplement: MED-43-614-s001.pdf [file MED-43-614-s001.pdf]

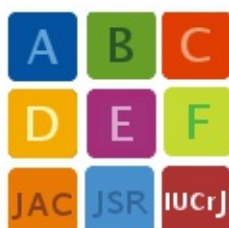

IUCr Journals

**Terms and conditions of use of the article titled**

**Crystal structures of the selenoprotein glutathione peroxidase 4 in its apo form and in complex with the covalently bound inhibitor ML162**

[Moosmayer *et al.* (2021). *Acta Cryst. D77*, 237-248  
<https://doi.org/10.1107/S2059798320016125>]

Permission to reproduce or reuse in whole or part the above article is granted to

Solveigh Koeberle

provided that the reused material is accompanied by an attribution statement according the terms of the open-access licence under which the original article was published, and that permission has been obtained from any other organizations or individuals where any parts of the material are subject to explicit statements of copyright or prior reproduction permission from such third parties.

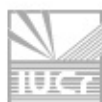

Peter Strickland  
Executive Managing Editor, IUCr Journals
